# Supplementary material for: Unraveling the enhancement mechanisms of H2S sensing on a SnO2surface: anab initioperspective
Source: Royal Society of Chemistry journal article supplement (doi:10.1039/d0cp01853h), 2020-01-01
Supplement: d0cp01853h1.pdf [file d0cp01853h1.pdf]

## Unraveling the enhancement mechanisms of H<sub>2</sub>S sensing in SnO<sub>2</sub> surface: an *ab initio* perspective

Yuting Liu, Chao Xu\*, Feng Long Gu

Key Laboratory of Theoretical Chemistry of Environment, Ministry of Education; School of Chemistry, South China Normal University, Guangzhou 51006, P. R. China.

**Table. S1** Some concerned Sn(Sb)-O bond lengths in SnO<sub>2</sub> before and after Sb-doping.

**Fig. S1** Optimized surface of SnO<sub>2</sub>(110) and Sb<sub>5c6c</sub>/SnO<sub>2</sub>(110) with various oxygen defects.

**Table. S2** The adsorption energy (eV) of O<sub>2</sub> at different positions on the surface of SnO<sub>2</sub>(110) and Sb<sub>5c6c</sub>/SnO<sub>2</sub>(110).

**Fig. S2** Optimized adsorption structure of O<sub>2</sub> on SnO<sub>2</sub> (110) and Sb<sub>5c6c</sub>/SnO<sub>2</sub> (110) surface at different positions.

**Table. S3** The dissociative O<sup>-</sup> atom adsorption energy (eV) at different positions on the surface of SnO<sub>2</sub>(110) and Sb<sub>5c6c</sub>/SnO<sub>2</sub>.

**Fig. S3** Optimized structure of dissociative O<sup>-</sup> atom absorption at different positions on the surface of SnO<sub>2</sub>(110) and Sb<sub>5c6c</sub>/SnO<sub>2</sub>(110).

**Table. S4** The adsorption energy (eV) of O<sub>2</sub> at different positions on the surface of Sb-doped SnO<sub>2</sub>(110) with O<sub>b</sub> vacancy(V(O<sub>b</sub>)).

**Fig. S4** Optimized adsorption structure of O<sub>2</sub> on Sb<sub>5c+6c</sub>/SnO<sub>2</sub> (110) surface with O<sub>b</sub> vacancy at different positions.

**Table. S5** The adsorption energy (eV) of H<sub>2</sub>S at different positions on the surface of SnO<sub>2</sub>(110) and Sb-doped SnO<sub>2</sub>(110).

**Fig. S5** Optimized structure of H<sub>2</sub>S at different positions on the surface of SnO<sub>2</sub>(110) and Sb<sub>5c6c</sub>/SnO<sub>2</sub>(110).

**Table. S6** The adsorption energy (eV) of H<sub>2</sub>S at different positions on the surface of Sb-doped SnO<sub>2</sub>(110) with O<sub>b</sub> vacancy.

**Fig. S6** Optimized structure of H<sub>2</sub>S at different positions on the surface of Sb<sub>5c6c</sub>/SnO<sub>2</sub>(110) with O<sub>b</sub> vacancy.

**Table. S7** The adsorption energy (eV) of H<sub>2</sub>S at different positions on the surface of Sb-doped SnO<sub>2</sub>(110) with pre-adsorbed O<sub>2</sub><sup>-</sup>.

**Fig. S7** Optimized structure of H<sub>2</sub>S at different positions on the surface of Sb<sub>5c6c</sub>/SnO<sub>2</sub>(110) with pre-adsorbed O<sub>2</sub><sup>-</sup>.

**Table. S8** The adsorption energy (eV) of H<sub>2</sub>S at different positions on the surface of Sb-doped SnO<sub>2</sub>(110) with preadsorbed O<sup>-</sup>. note: O(Sb<sub>5c</sub>) represents O adsorbed on Sb<sub>5c</sub>.

**Fig. S8** Optimized structure of H<sub>2</sub>S at different positions on the surface of Sb<sub>5c6c</sub>/SnO<sub>2</sub>(110) with preadsorbed O<sup>-</sup>.

**Table S1** Some concerned Sn(Sb)-O bond lengths in SnO<sub>2</sub> before and after Sb-doping.

| Bond (Å)                                   | Sn <sub>6c</sub> -O <sub>b</sub> | Sn <sub>6c</sub> -O <sub>p</sub> | Sn <sub>5c</sub> -O <sub>p</sub> | Sn <sub>5c</sub> -O <sub>3b</sub> |
|--------------------------------------------|----------------------------------|----------------------------------|----------------------------------|-----------------------------------|
| SnO <sub>2</sub> (110)                     | 1.966                            | 2.107                            | 2.029                            | 1.971                             |
| Sb <sub>5c6c</sub> /SnO <sub>2</sub> (110) | 1.963                            | 2.039                            | 2.181                            | 2.207                             |

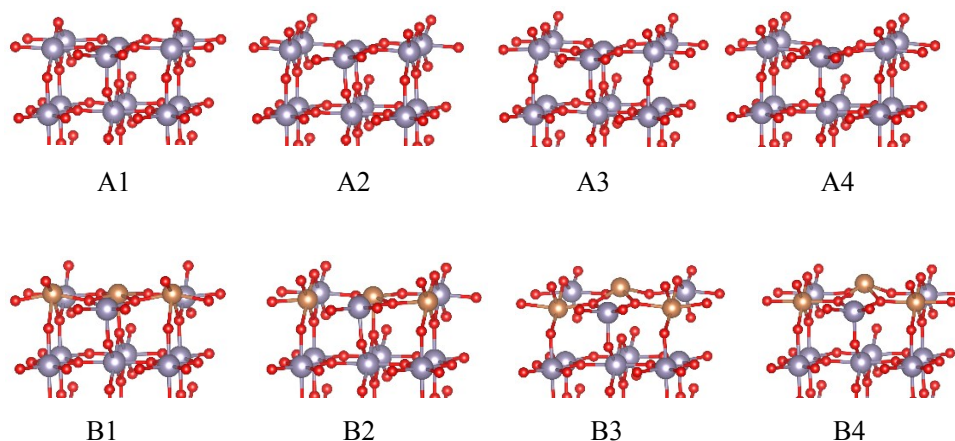**Fig. S1** Optimized surface of SnO<sub>2</sub>(110) and Sb<sub>5c6c</sub>/SnO<sub>2</sub>(110) with various oxygen defects. (A1; B1) skin layer bridging oxygen; (A2; B2) skin layer plane oxygen; (A3; B3) inner layer the first bridging oxygen; (A4; B4) inner layer the second bridging oxygen.**Table S2** The adsorption energy (eV) of O<sub>2</sub> at different positions on the surface of SnO<sub>2</sub>(110) and Sb<sub>5c6c</sub>/SnO<sub>2</sub>(110).

| Adsorption sites                           | O <sub>b</sub> | O <sub>p</sub> | Sn <sub>5c</sub> | Sn <sub>6c</sub> | Sb <sub>5c</sub> | Sb <sub>6c</sub> |
|--------------------------------------------|----------------|----------------|------------------|------------------|------------------|------------------|
| SnO <sub>2</sub> (110)                     | -0.0512        | -0.1474        | -0.2575          | -0.0703          | -                | -                |
| Sb <sub>5c6c</sub> /SnO <sub>2</sub> (110) | -0.0509        | -0.1270        | -0.1901          | -0.0637          | -0.0795          | -0.0564          |

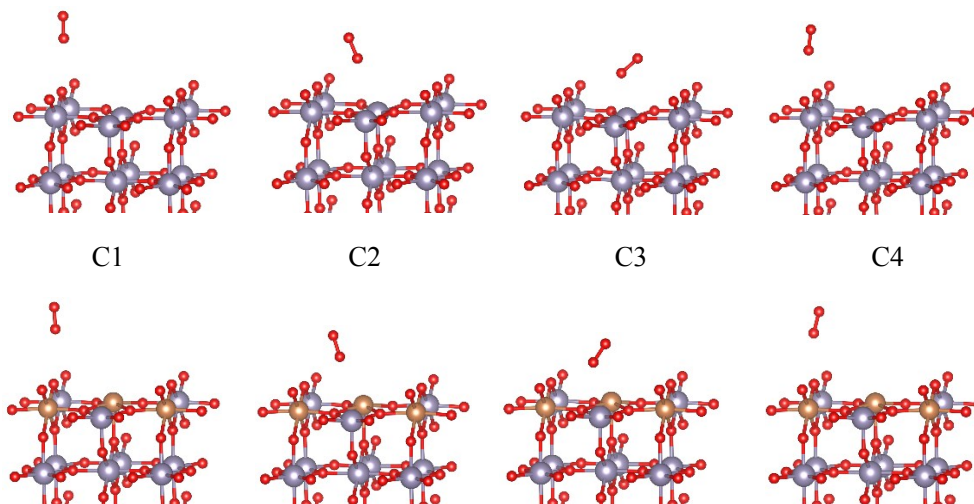

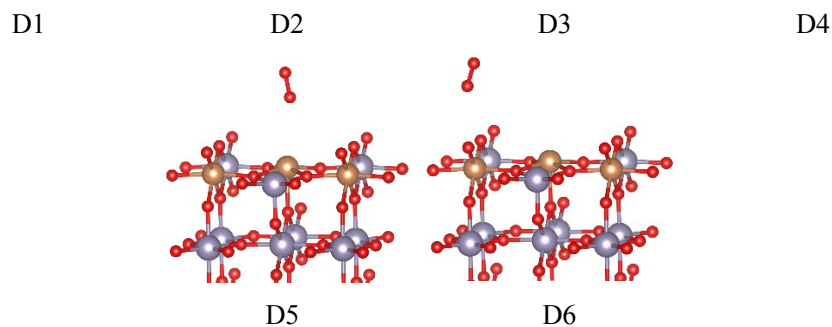

Fig. S2 Optimized adsorption structure of  $O_2$  on  $SnO_2$  (110) and  $Sb_{5c6c}/SnO_2$  (110) surface at different positions. (C1-C4)  $O_2$  molecular is adsorbed respectively at the sites of  $O_b$ ;  $O_p$ ;  $Sn_{5c}$  and  $Sn_{6c}$  on the  $SnO_2(110)$  surfaces. (D1-D6)  $O_2$  molecular is adsorbed respectively at the sites of  $O_b$ ;  $O_p$ ;  $Sn_{5c}$ ;  $Sn_{6c}$ ;  $Sb_{5c}$  and  $Sb_{6c}$  on the  $Sb_{5c6c}/SnO_2(110)$  surfaces.

**Table S3** The dissociative  $O^-$  atom adsorption energy (eV) at different positions on the surface of  $SnO_2(110)$  and  $Sb_{5c6c}/SnO_2$ .

| Adsorption sites       | $O_b$  | $O_p$  | $Sn_{5c}$ | $Sn_{6c}$ | $Sb_{5c}$ | $Sb_{6c}$ |
|------------------------|--------|--------|-----------|-----------|-----------|-----------|
| $SnO_2(110)$           | 2.7858 | 1.3996 | 1.4172    | 2.7859    | -         | -         |
| $Sb_{5c6c}/SnO_2(110)$ | 2.8527 | 0.2391 | 0.9195    | 1.5265    | 0.0627    | 2.8428    |

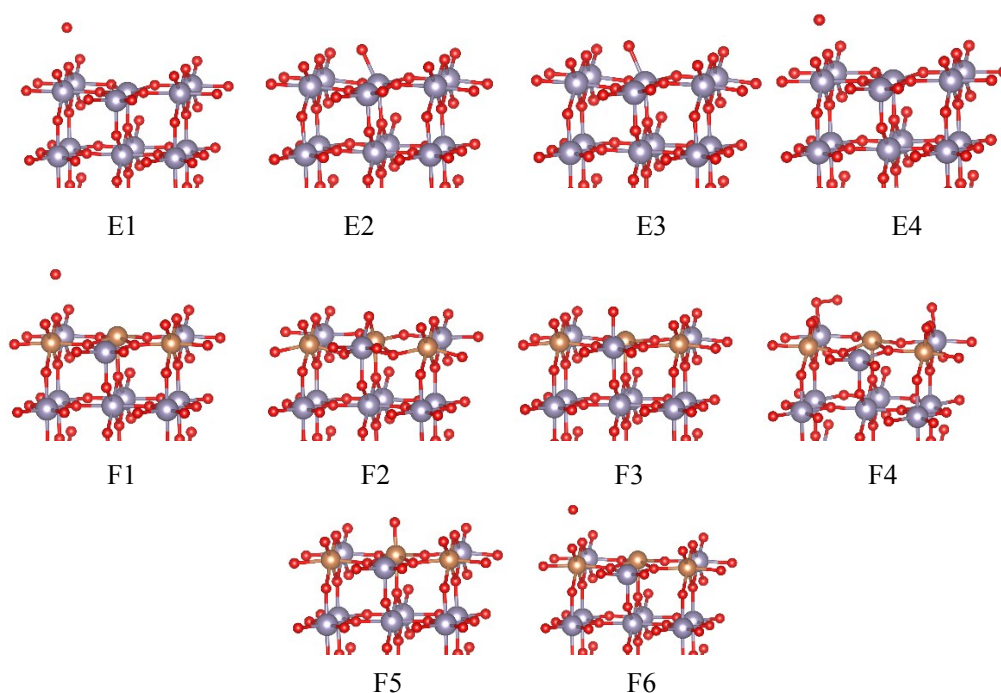

**Fig. S3** Optimized structure of dissociative  $O^-$  atom absorption at different positions on the surface of  $SnO_2(110)$  and  $Sb_{5c6c}/SnO_2(110)$ . (E1-E4)  $O^-$  atom is adsorbed respectively at the sites of  $O_b$ ;  $O_p$ ;  $Sn_{5c}$  and  $Sn_{6c}$  on the  $SnO_2(110)$  surfaces. (F1-F6)  $O^-$  atom is adsorbed respectively at the sites of  $O_b$ ;  $O_p$ ;  $Sn_{5c}$ ;  $Sn_{6c}$ ;  $Sb_{5c}$  and  $Sb_{6c}$  on the  $Sb$ -doped  $SnO_2(110)$  surfaces.

**Table S4** The adsorption energy (eV) of O<sub>2</sub> at different positions on the surface of Sb-doped SnO<sub>2</sub>(110) with O<sub>b</sub> vacancy(V(O<sub>b</sub>)). V(o)1 represents that O<sub>2</sub> is placed above the oxygen vacancy and parallel to the X axis. V(o)2 means that O<sub>2</sub> is placed above the oxygen vacancy and parallel to the Y axis.

| Adsorption sites                           | O <sub>b</sub> | O <sub>p</sub> | Sn <sub>5c</sub> | Sn <sub>6c</sub> | Sb <sub>5c</sub> | Sb <sub>6c</sub> | V(o)1   | V(o)2   |
|--------------------------------------------|----------------|----------------|------------------|------------------|------------------|------------------|---------|---------|
| Sb <sub>5c6c</sub> /SnO <sub>2</sub> (110) | -1.1461        | -0.1217        | -0.1471          | -0.1066          | -0.1056          | -0.0899          | -1.3710 | -1.2153 |

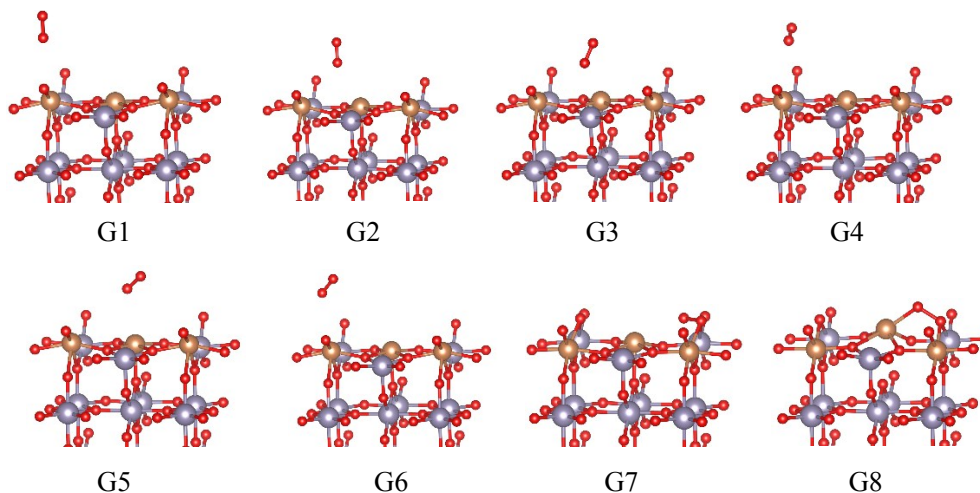

**Fig. S4** Optimized adsorption structure of O<sub>2</sub> on Sb<sub>5c6c</sub>/SnO<sub>2</sub> (110) surface with O<sub>b</sub> vacancy at different positions. (G1-G6) O<sub>2</sub> molecular adsorption respectively at the sites of O<sub>b</sub> ; O<sub>p</sub>; Sn<sub>5c</sub>; Sn<sub>6c</sub>; Sb<sub>5c</sub>; Sb<sub>6c</sub>. (G7) O<sub>2</sub> molecular is placed above the oxygen vacancy and parallel to the X axis. (G8) O<sub>2</sub> molecular is placed above the oxygen vacancy and parallel to the Y axis.

**Table S5** The adsorption energy (eV) of H<sub>2</sub>S at different positions on the surface of SnO<sub>2</sub>(110) and Sb-doped SnO<sub>2</sub>(110).

| Adsorption sites                           | O <sub>b</sub> | O <sub>p</sub> | Sn <sub>5c</sub> | Sn <sub>6c</sub> | Sb <sub>5c</sub> | Sb <sub>6c</sub> |
|--------------------------------------------|----------------|----------------|------------------|------------------|------------------|------------------|
| SnO <sub>2</sub> (110)                     | -0.2809        | -2.0670        | -2.0749          | -0.1984          | -                | -                |
| Sb <sub>5c6c</sub> /SnO <sub>2</sub> (110) | -0.1629        | -1.5819        | -1.5921          | -0.2337          | -0.1158          | -0.1861          |

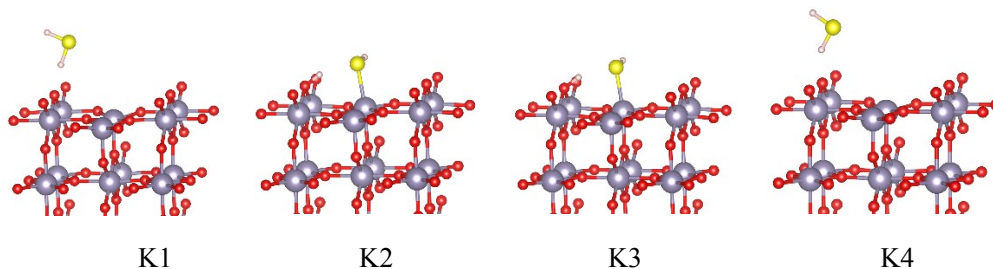

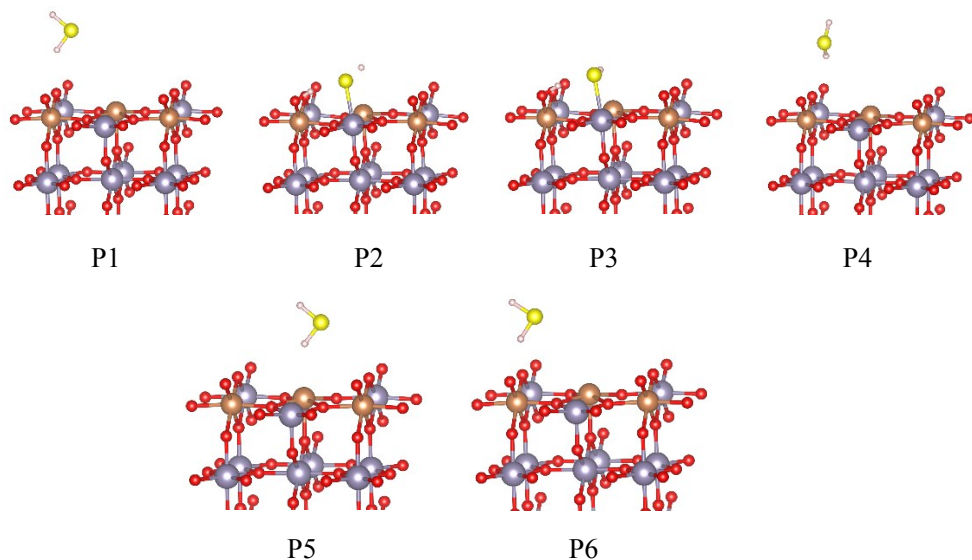

**Fig. S5** Optimized structure of H<sub>2</sub>S at different positions on the surface of SnO<sub>2</sub>(110) and Sb<sub>5c6c</sub>/SnO<sub>2</sub>(110). (K1-K4) H<sub>2</sub>S molecular is adsorbed respectively at the sites of O<sub>b</sub>; O<sub>p</sub>; Sn<sub>5c</sub> and Sn<sub>6c</sub> on the SnO<sub>2</sub>(110) surfaces. (P1-P6) H<sub>2</sub>S molecular is adsorbed respectively at the sites of O<sub>b</sub>; O<sub>p</sub>; Sn<sub>5c</sub>; Sn<sub>6c</sub>; Sb<sub>5c</sub> and Sb<sub>6c</sub> on the Sb<sub>5c6c</sub>/SnO<sub>2</sub>(110) surfaces.

**Table S6** The adsorption energy (eV) of H<sub>2</sub>S at different positions on the surface of Sb-doped SnO<sub>2</sub>(110) with O<sub>b</sub> vacancy.

| Adsorption sites                           | O <sub>b</sub> | O <sub>p</sub> | Sn <sub>5c</sub> | Sn <sub>6c</sub> | Sb <sub>5c</sub> | Sb <sub>6c</sub> | V(o)    |
|--------------------------------------------|----------------|----------------|------------------|------------------|------------------|------------------|---------|
| Sb <sub>5c6c</sub> /SnO <sub>2</sub> (110) | -0.1214        | -0.2163        | -1.5280          | -0.3819          | -0.1921          | -0.2636          | -0.3746 |

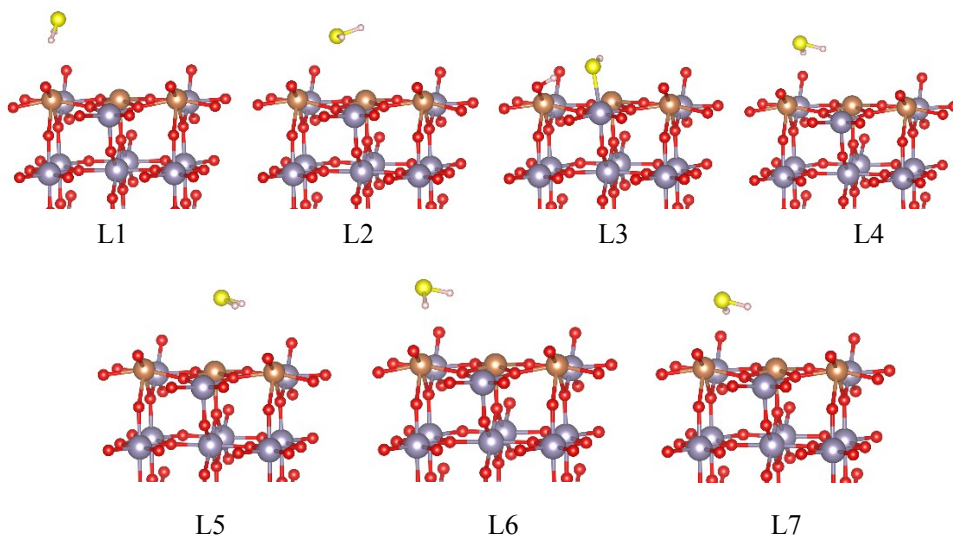

**Fig. S6** Optimized structure of H<sub>2</sub>S at different positions on the surface of Sb<sub>5c6c</sub>/SnO<sub>2</sub>(110) with O<sub>b</sub> vacancy. (L1-L6) H<sub>2</sub>S molecular is adsorbed respectively at the sites of O<sub>b</sub>; O<sub>p</sub>; Sn<sub>5c</sub>; Sn<sub>6c</sub>; Sb<sub>5c</sub> and Sb<sub>6c</sub> on the Sb<sub>5c6c</sub>/SnO<sub>2</sub>(110) surfaces. (L7) H<sub>2</sub>S molecular is adsorbed at the sites of O<sub>b</sub> vacancy.



**Table S7** The adsorption energy (eV) of H<sub>2</sub>S at different positions on the surface of Sb-doped SnO<sub>2</sub>(110) with pre-adsorbed O<sub>2</sub><sup>-</sup>.

| Adsorption sites                           | O <sub>b</sub> | O <sub>p</sub> | Sn <sub>5c</sub> | Sn <sub>6c</sub> | Sb <sub>5c</sub> | Sb <sub>6c</sub> |
|--------------------------------------------|----------------|----------------|------------------|------------------|------------------|------------------|
| Sb <sub>5c6c</sub> /SnO <sub>2</sub> (110) | -0.1957        | -1.6601        | -1.1299          | 0.0577           | -0.3271          | -0.9727          |

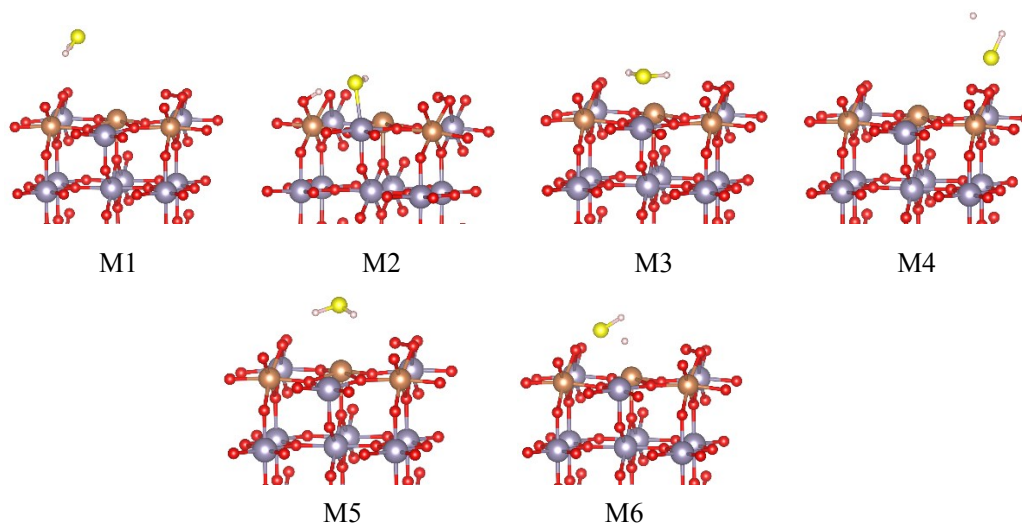

**Fig. S7** Optimized structure of H<sub>2</sub>S at different positions on the surface of Sb<sub>5c6c</sub>/SnO<sub>2</sub>(110) with pre-adsorbed O<sub>2</sub><sup>-</sup>. (M1-M6) H<sub>2</sub>S molecular is adsorbed respectively at the sites of O<sub>b</sub>; O<sub>p</sub>; Sn<sub>5c</sub>; Sn<sub>6c</sub>; Sb<sub>5c</sub> and Sb<sub>6c</sub> on the surface.

**Table S8** The adsorption energy (eV) of H<sub>2</sub>S at different positions on the surface of Sb-doped SnO<sub>2</sub>(110) with preadsorbed O<sup>-</sup>. note: O(Sb<sub>5c</sub>) represents O adsorbed on Sb<sub>5c</sub>.

| Adsorption sites                           | O <sub>b</sub> | O <sub>p</sub> | Sn <sub>5c</sub> | Sn <sub>6c</sub> | O(Sb <sub>5c</sub> ) | Sb <sub>6c</sub> |
|--------------------------------------------|----------------|----------------|------------------|------------------|----------------------|------------------|
| Sb <sub>5c6c</sub> /SnO <sub>2</sub> (110) | -0.2744        | -3.1022        | -3.1183          | -0.5022          | -0.3168              | -0.4842          |

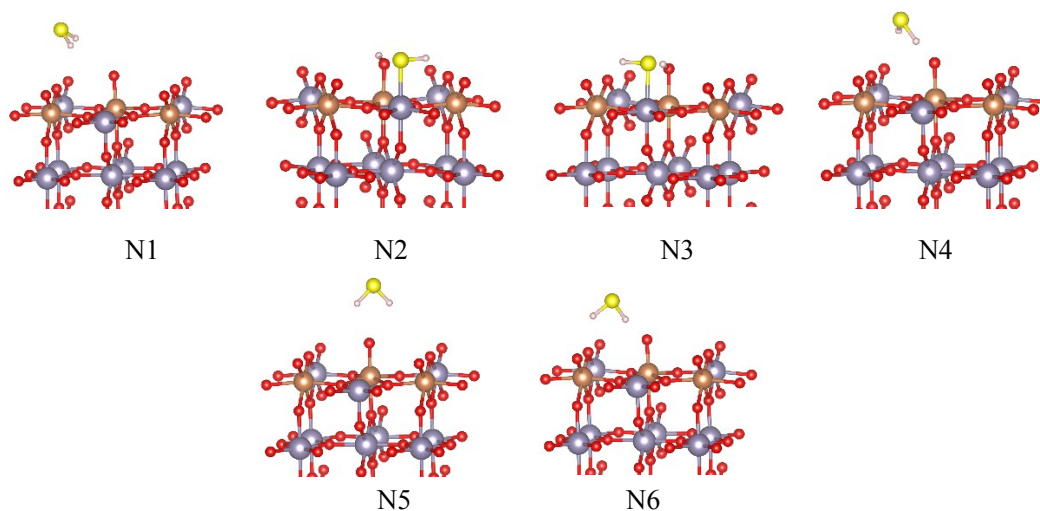

**Fig. S8** Optimized structure of H<sub>2</sub>S at different positions on the surface of Sb<sub>5c6c</sub>/SnO<sub>2</sub>(110) with preadsorbed O<sup>•</sup>. (N1-N6) H<sub>2</sub>S molecular is adsorbed respectively at the sites of O<sub>b</sub>; O<sub>p</sub>; Sn<sub>5c</sub>; Sn<sub>6c</sub>; O(Sb<sub>5c</sub>) and Sb<sub>6c</sub> on the surface. O(Sb<sub>5c</sub>) represents O adsorbed on Sb<sub>5c</sub>.
